# Supplementary material
Source: publisher figshare collection journal article supplement (https://gsajournals.figshare.com/ndownloader/files/12776405)
Supplement: Supplementary file 1 [file 12776405]

Table S12. Allele effects of significant SNPs showing the highest association with black seed coat and purple pod tip color in the mini-core population.
Marker	Chr	Consensus Map Position (cM)	Physical Position (nt)	Allele	Effect	Obs
2_00604	5		2506154	AA	-3.04E-01	164
2_00604	5		2506154	CC	0	156
2_12036	5		2992413	AA	-3.52E-01	90
2_12036	5		2992413	GG	-8.12E-01	281
2_12036	5		2992413	AG	0	1
2_29558	5		3002809	AA	-7.99E-01	280
2_29558	5		3002809	GG	-3.55E-01	91
2_29558	5		3002809	AG	0	1
2_19309	5		3104538	CC	0.08903	166
2_19309	5		3104538	TT	-4.51E-01	204
2_19309	5		3104538	CT	0	2
2_17575	5		3109232	CC	0.42775	44
2_17575	5		3109232	TT	0.03159	326
2_17575	5		3109232	CT	0	1
2_17576	5		3109789	AA	0.02987	327
2_17576	5		3109789	CC	0.42792	44
2_17576	5		3109789	AC	0	1
2_21786	5		3121891	CC	0.47791	75
2_21786	5		3121891	TT	0.00324	296
2_21786	5		3121891	CT	0	1
2_21787	5		3122206	CC	0.00353	296
2_21787	5		3122206	TT	0.47231	74
2_21787	5		3122206	CT	0	1
2_40348	5		3192252	AA	-5.67E-01	287
2_40348	5		3192252	GG	-2.35E-03	44
2_40348	5		3192252	AG	0	1
2_15182	5		3225877	AA	0.00338	135
2_15182	5		3225877	GG	-4.62E-01	235
2_15182	5		3225877	AG	0	3
2_15997	5		3265696	AA	-8.76E-02	69
2_15997	5		3265696	CC	-4.68E-01	301
2_15997	5		3265696	AC	0	3
2_15996	5		3267152	CC	0.04915	100
2_15996	5		3267152	TT	-3.39E-01	270
2_15996	5		3267152	CT	0	2
2_21972	5		3274155	CC	-4.61E-01	269
2_21972	5		3274155	TT	-1.12E-01	95
2_21972	5		3274155	CT	0	3
2_39658	5		3593399	AA	0.62241	52
2_39658	5		3593399	GG	0	304
